# Supplementary material for: Genome-wide identification and spatiotemporal expression profiling of zinc finger SWIM domain-containing protein family genes
Source: PubMed Central journal article supplement — Zool Res. 2023 May 18;44(3):663–74. doi: 10.24272/j.issn.2095-8137.2022.418 (PMC10236294; doi:10.24272/j.issn.2095-8137.2022.418), 2023-05-18
Supplement: zr-44-663-S1.pdf [file zr-44-663-S1.pdf]

## Supplementary Materials

### Genome-wide identification and spatiotemporal expression profiling of zinc finger SWIM domain-containing protein family genes

Intiaz Ul Hassan<sup>1</sup>, Hafiz Mamoon Rehman<sup>2</sup>, Ziran Liu<sup>1</sup>, Liangji Zhou<sup>1</sup>, Muhammad Kaleem Samma<sup>5</sup>, Chengdong Wang<sup>1</sup>, Zixin Rong<sup>6</sup>, Xufeng Qi<sup>4</sup>, Dongqing Cai<sup>4</sup>, Hui Zhao<sup>1,3,7,\*</sup>

1. Key Laboratory for Regenerative Medicine, Ministry of Education, School of Biomedical Sciences, Faculty of Medicine, The Chinese University of Hong Kong, Hong Kong SAR, China
2. Centre for Agricultural Biochemistry and Biotechnology (CABB), University of Agriculture Faisalabad, Faisalabad 38000, Pakistan
3. Kunming Institute of Zoology - The Chinese University of Hong Kong (KIZ-CUHK) Joint Laboratory of Bioresources and Molecular Research of Common Diseases, Hong Kong SAR, China
4. Key Laboratory of Regenerative Medicine of Ministry of Education, Department of Developmental & Regenerative Biology, Jinan University, Guangzhou 511436, China
5. Department of Biology and Chemistry, City University of Hong Kong, Hong Kong SAR, China
6. Department of Gene Technology, School of Engineering Sciences in Chemistry, Biotechnology and Health (CBH), KTH Royal Institute of Technology, 10691 Stockholm, Sweden
7. Hong Kong Branch of CAS Center for Excellence in Animal Evolution and Genetics, The Chinese University of Hong Kong, Hong Kong SAR, China

\*Corresponding author, E-mail: zhaohui@cuhk.edu.hk

(A)

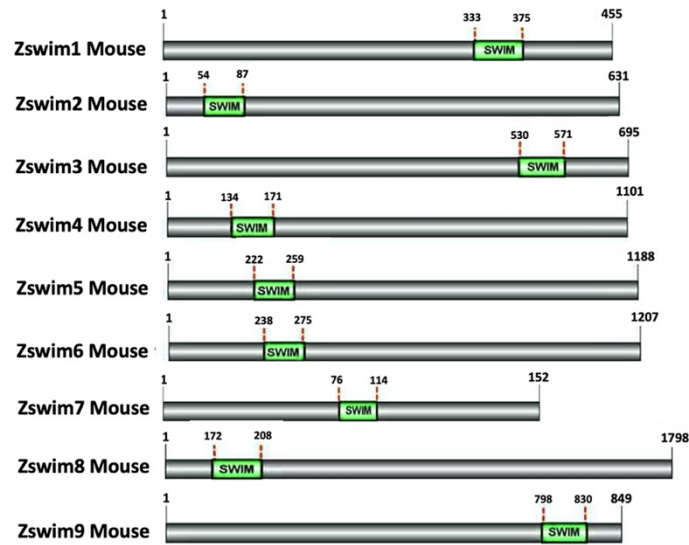

(B)

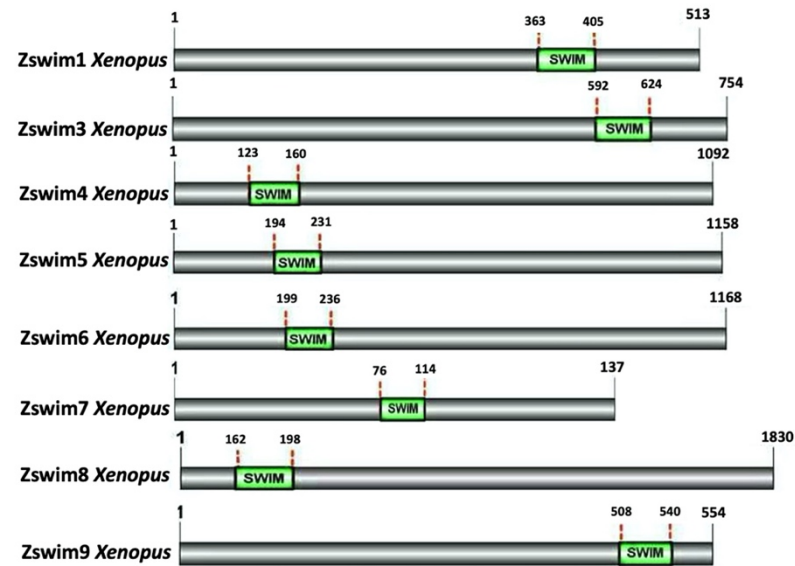

(C)

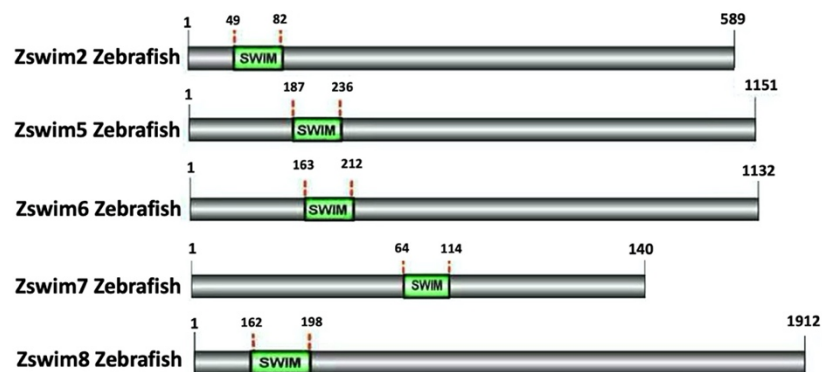

### Supplementary Figure S1 Identification of SWIM domains

A-C: Identification of ZSWIM family members and localization of SWIM domain in mice, *Xenopus*, and zebrafish.

A

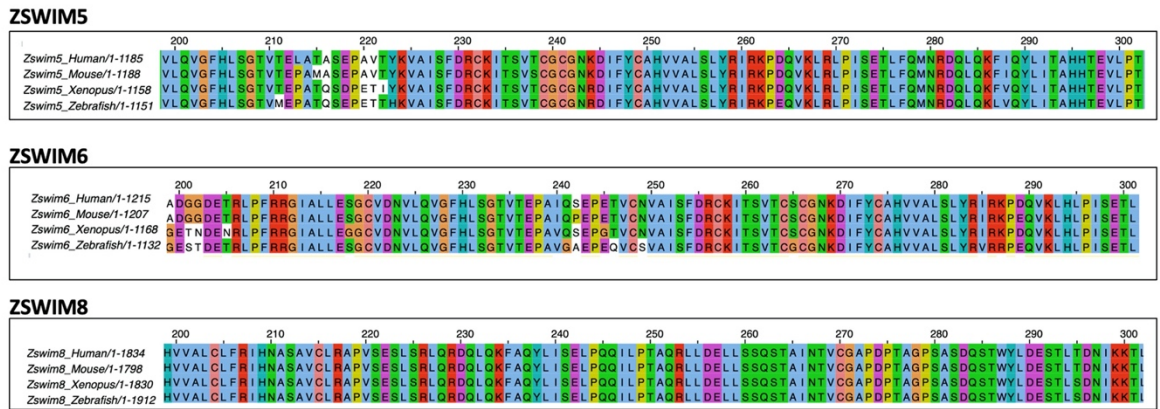

B

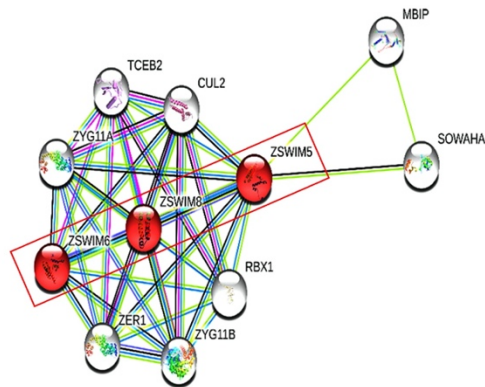

**Supplementary Figure S2 Multiple sequence alignment and protein-protein interaction analysis**

A: Amino acid sequence alignment of highly identical members. B: Prediction of interactions between ZSWIM family members using the online STRING tool. The red rectangle highlights possible interactions among ZSWIM5, ZSWIM6, and ZSWIM8.

(A)

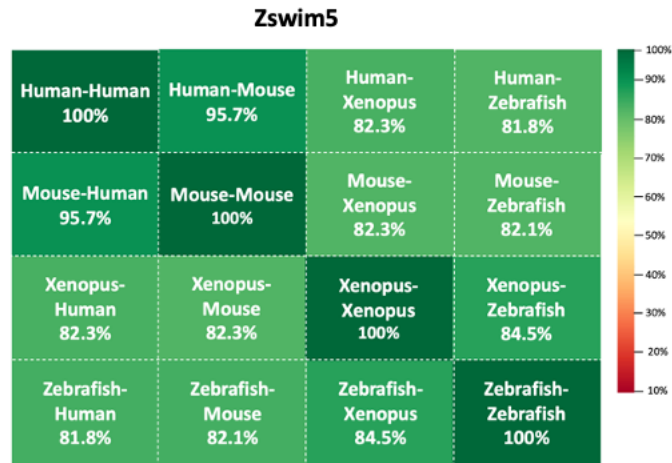

(B)

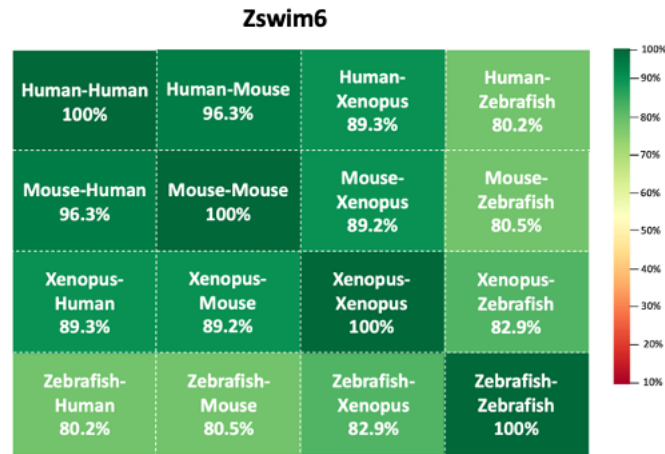

(C)

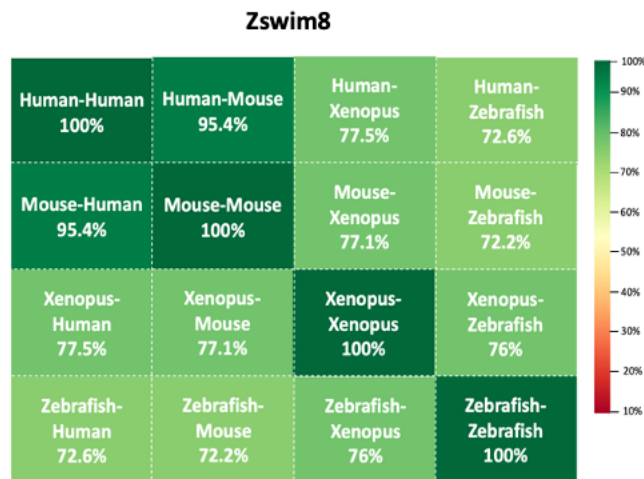

**Supplementary Figure S3 Percentage of sequence identity of aligned ZSWIM family members**

A-C: Heatmap representing percentage identity of highly identical members of the ZSWIM family i.e., ZSWIM5, ZSWIM6, and ZSWIM8.

(A)

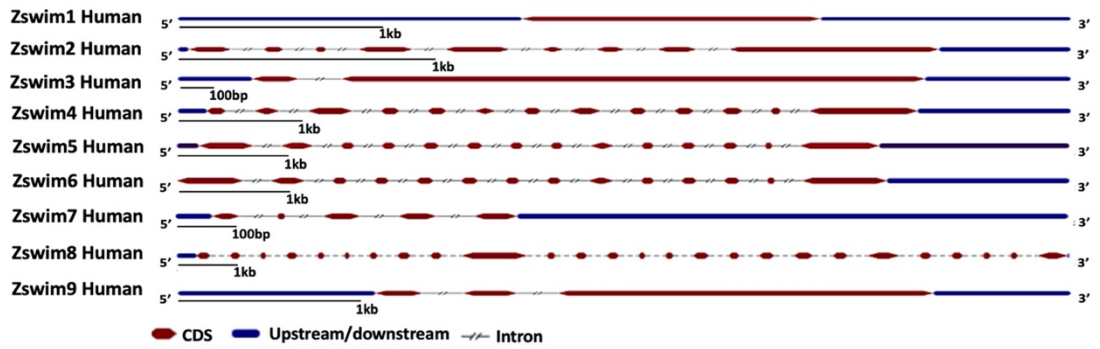

(B)

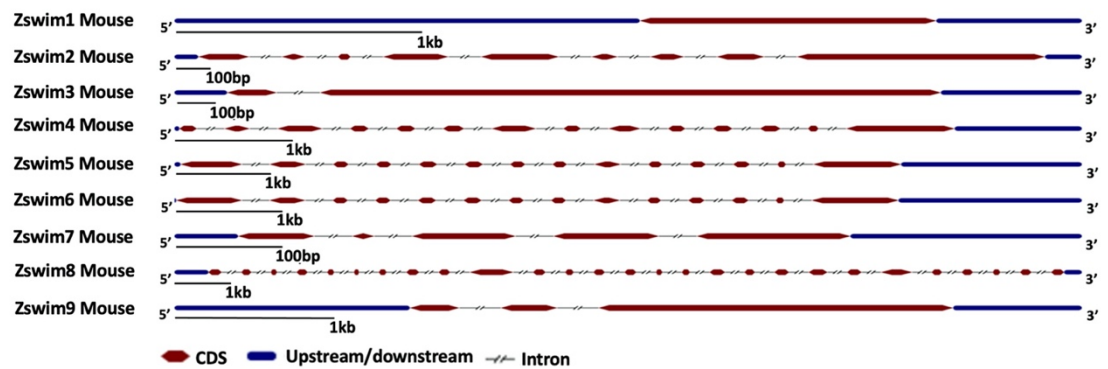

(C)

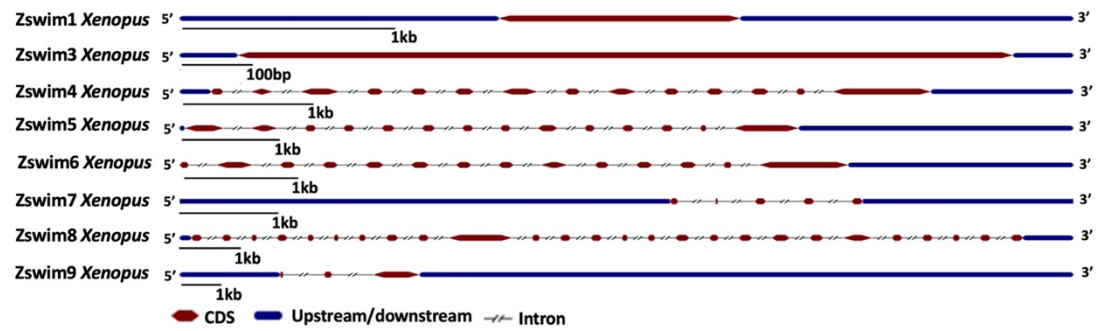

(D)

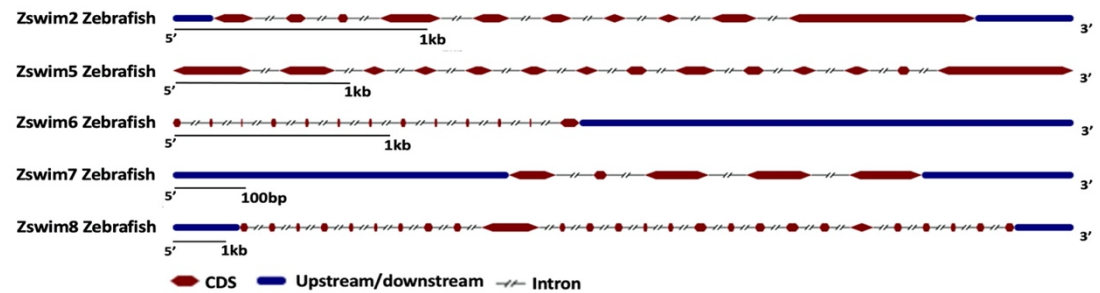

### Supplementary Figure S4 Gene structure analysis

Exon-intron structure of *ZSWIM* genes in humans (A), mice (B), *Xenopus* (C), and

zebrafish (D).

(A)

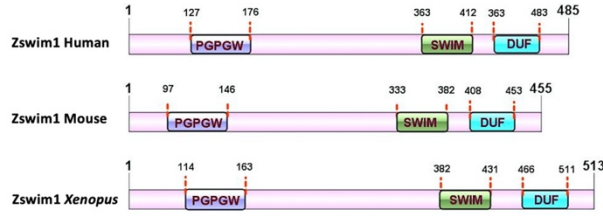

(B)

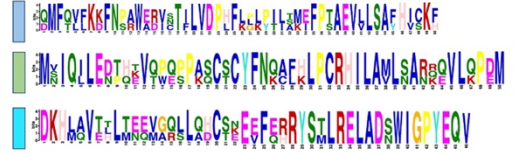

(C)

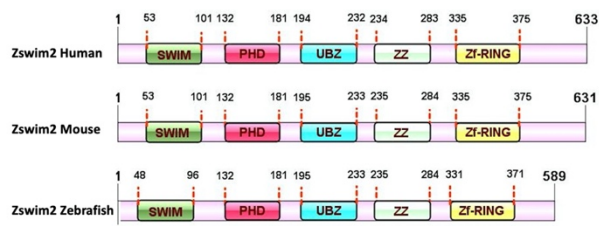

(D)

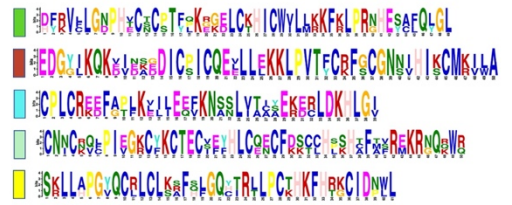

(E)

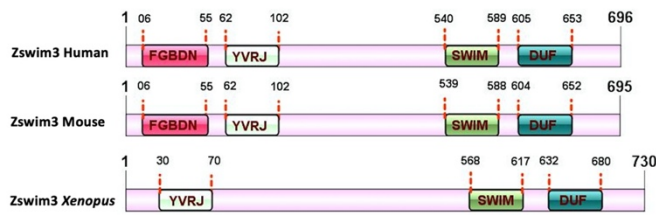

(F)

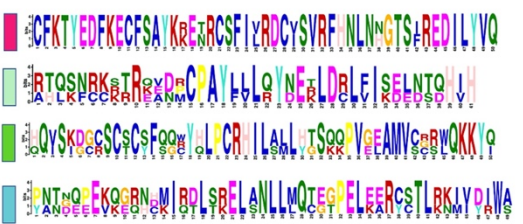

(G)

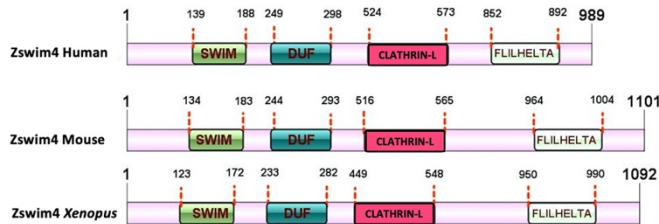

(H)

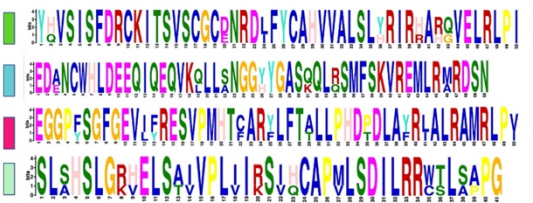



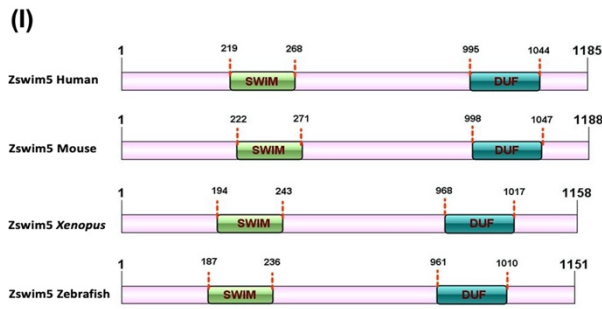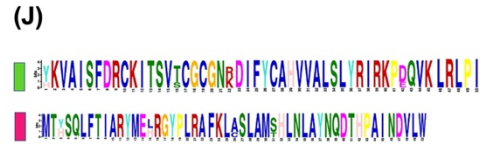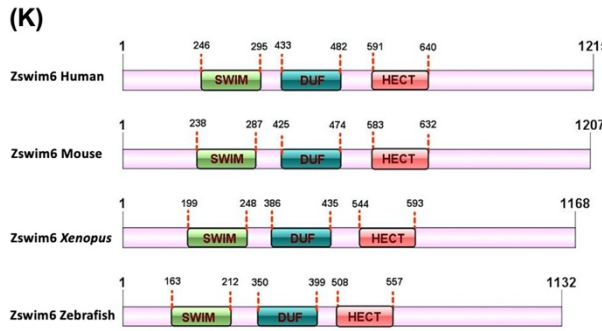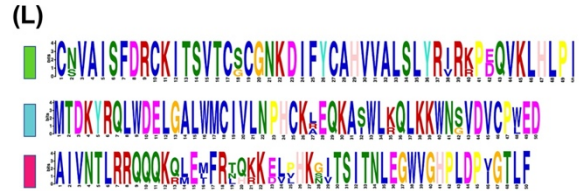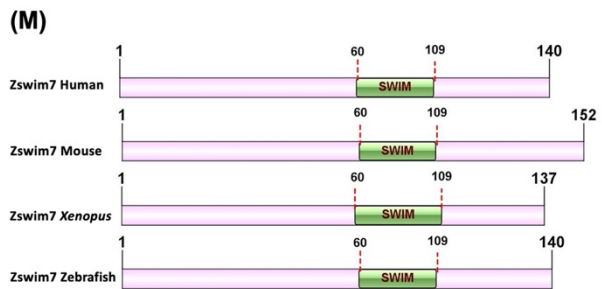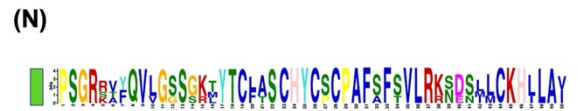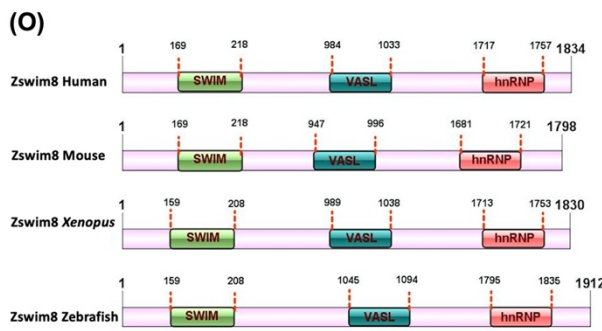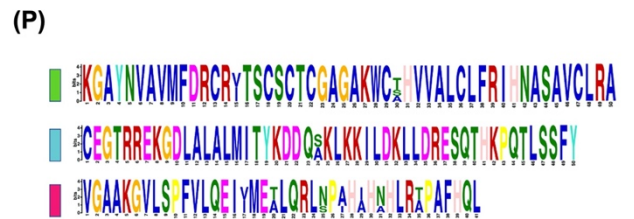

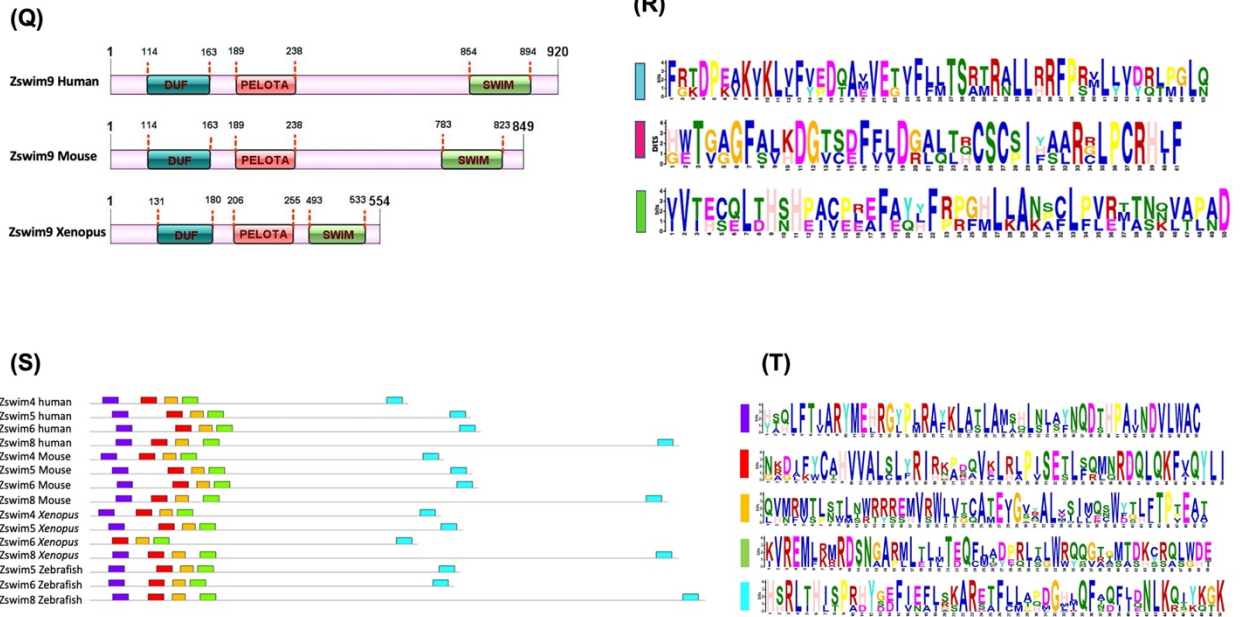

### Supplementary Figure S5 Identification of conserved motifs in ZSWIM family members

A, C, E, G, I, K, M, O, Q: Schematic representations of ZSWIM1, ZSWIM2, ZSWIM3, ZSWIM4, ZSWIM5, ZSWIM6, ZSWIM7, ZSWIM8, and ZSWIM9 showing different conserved motifs in humans, mice, and *Xenopus*. Motif abbreviations: PGPGW, putative transmembrane protein family; SWIM, zinc finger SWIM-type domain; DUF, domain of unknown function; FGBDN, formin N-terminal GTPase binding domain; YVRJ, YvrJ protein family; CLATHRIN-L, clathrin heavy chain linker; FLILHELTA, hypothetical protein family; HECT, ubiquitin transferase domain; VASL, type VI secretion system protein family; hnRNP, heterogenous nuclear ribonuclear protein family. B, D, F, H, J, L, N, P, R: Sequence logos of each identified domains in the corresponding ZSWIM members. S: ZSWIM4, ZSWIM5, ZSWIM6, and ZSWIM8 contained conserved motifs in all four organisms, as indicated by sequence logos in (T).



## Zswim9

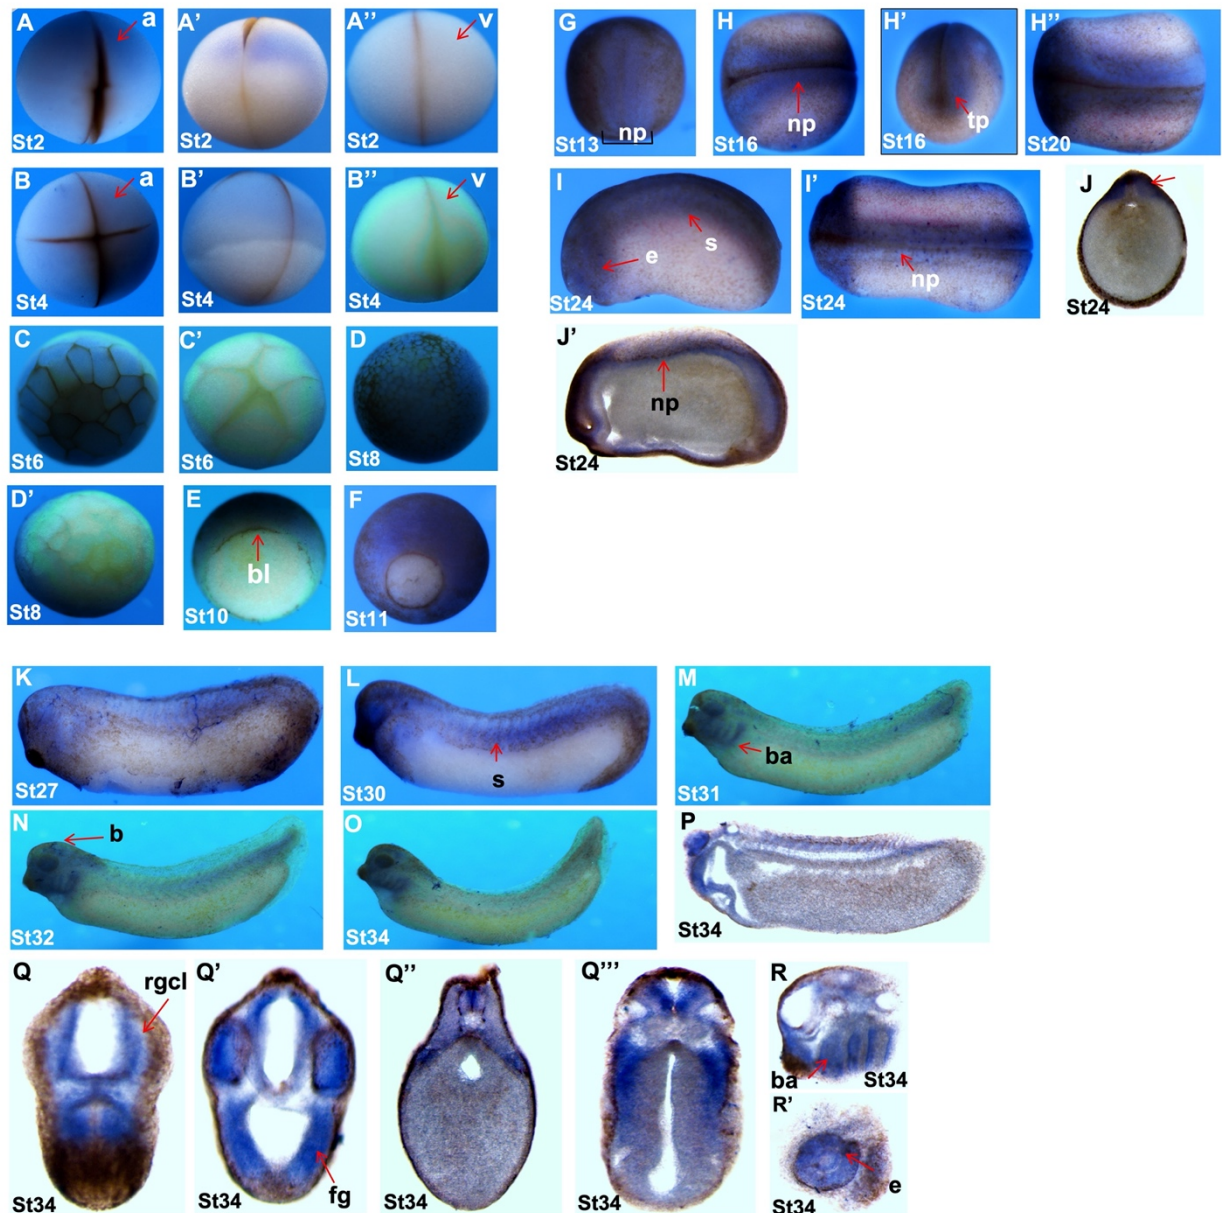

### Supplementary Figure S6 Faint expression of *zswim9* throughout embryogenesis

Spatial expression levels of *zswim9* were analyzed by whole-mount *in situ* hybridization. (A-A'') Stage 2 embryo, animal view (A), lateral view (A'), vegetal view (A''). (B-B'') Stage 3 embryo, animal view (B), lateral view (B'), vegetal view (B''). (C) Embryo at blastula stage (stage 6), animal view (C), vegetal view (C'). (D, D') Blastula stage (stage 8), animal view (D), vegetal view (D'). (E) Gastrula stage (stage 10). Blastopore lip is indicated by red arrow. (F) Mid gastrula stage (stage 11), dorsal view. (G) Early neurula stage (13), dorsal view. (H-H') Mid neurula stage (stage 16) lateral view (H), anterior (H') view. (H'') Late neurula stage (stage 20), dorsal view. (I-J') Mid tailbud stage (stage 24) lateral view (I), dorsal view (I'). Longitudinal (J) and

transverse sections (J'). (K-O) Late tailbud stages (stages 27 to 34), lateral view. (P) Late tailbud stage (stage 34). (P-R') Sections of stage 34 embryos. (P) Longitudinal section. (Q-Q''') Transverse sections (R-R'). (R, R') Longitudinal sections crossing head region. Abbreviations: a, animal; b, brain; br, branchial arch; bl: blastopore lip; e, eye; fg, foregut; np, neural plate; nt, neural tube; s, somites; tp, trigeminal placode; v, vegetal.

**Supplementary Table S1 List of *Zswim* gene accession numbers used in this study.**

| <b>Gene Name</b> | <b>Organism</b>           | <b>Accession No#</b> |
|------------------|---------------------------|----------------------|
| ZSWIM1           | Human                     | NM_080603.5          |
| ZSWIM2           | Human                     | NM_182521.3          |
| ZSWIM3           | Human                     | NM_080752.4          |
| ZSWIM4           | Human                     | NM_001367834.3       |
| ZSWIM5           | Human                     | NM_020883.2          |
| ZSWIM6           | Human                     | NM_020928.2          |
| ZSWIM7           | Human                     | NM_001042697.2       |
| ZSWIM8           | Human                     | NM_001242487.2       |
| ZSWIM9           | Human                     | NM_199341.4          |
| ZSWIM1           | Mouse                     | NM_028028.3          |
| ZSWIM2           | Mouse                     | NM_027964.2          |
| ZSWIM3           | Mouse                     | NM_178375.2          |
| ZSWIM4           | Mouse                     | NM_172503.3          |
| ZSWIM5           | Mouse                     | NM_001029912.3       |
| ZSWIM6           | Mouse                     | NM_145456.3          |
| ZSWIM7           | Mouse                     | NM_027198.1          |
| ZSWIM8           | Mouse                     | NM_001252081.2       |
| ZSWIM9           | Mouse                     | NM_177312.4          |
| ZSWIM1           | <i>Xenopus tropicalis</i> | NM_001004917.1       |
| ZSWIM3           | <i>Xenopus tropicalis</i> | XM_031894541.1       |
| ZSWIM4           | <i>Xenopus tropicalis</i> | XM_002941011.5       |
| ZSWIM5           | <i>Xenopus tropicalis</i> | NM_001097236.1       |
| ZSWIM6           | <i>Xenopus tropicalis</i> | XM_031894058.1       |
| ZSWIM7           | <i>Xenopus tropicalis</i> | XM_004911686.4       |
| ZSWIM8           | <i>Xenopus tropicalis</i> | XM_012966846.3       |
| ZSWIM9           | <i>Xenopus tropicalis</i> | XM_004916203.4       |
| ZSWIM2           | Zebrafish                 | NM_001100143.1       |
| ZSWIM5           | Zebrafish                 | NM_001144819.1       |
| ZSWIM6           | Zebrafish                 | NM_001136487.1       |
| ZSWIM7           | Zebrafish                 | NM_001083540.1       |
| ZSWIM8           | Zebrafish                 | NM_001145707.1       |

**Supplementary Table S2** List of all ZSWIM family members identified in four well-characterized model organisms, including humans, mice, *X. tropicalis*, and zebrafish.

| Gene Name | Gene ID   | Chromosome |            |           | UniProtKB/Swiss-Pro | Length (aa) | SWIM position | Molecular Weight (Average Mass) | PI   | Organism           |
|-----------|-----------|------------|------------|-----------|---------------------|-------------|---------------|---------------------------------|------|--------------------|
|           |           | No         | Start      | End       |                     |             |               |                                 |      |                    |
| ZSWIM1    | 90204     | C20        | 45880920   | 45885266  | Q9BR11              | 485         | 363-405       | 55070.55                        | 7.05 | Homo sapiens       |
| ZSWIM2    | 151112    | C2         | 186827475  | 186849170 | Q8NEG5              | 633         | 54-88         | 72732.01                        | 8.95 | Homo sapiens       |
| ZSWIM3    | 140831    | C20        | 45857581   | 45879131  | Q96MP5              | 696         | 571-572       | 79454.06                        | 7.27 | Homo sapiens       |
| ZSWIM4    | 65249     | C19        | 13795424   | 13832254  | Q9H7M6              | 989         | 139-176       | 110138.02                       | 6.63 | Homo sapiens       |
| ZSWIM5    | 57643     | C1         | 45016399   | 45206605  | Q9P217              | 1185        | 219-256       | 130633.51                       | 6.78 | Homo sapiens       |
| ZSWIM6    | 57688     | C5         | 61332258   | 61546172  | Q9HCJ5              | 1215        | 246-283       | 133470.37                       | 7.01 | Homo sapiens       |
| ZSWIM7    | 125150    | C17        | 15976560   | 15999704  | Q19AV6              | 140         | 66-114        | 15385.92                        | 6.7  | Homo sapiens       |
| ZSWIM8    | 23053     | C10        | 73785577   | 73801798  | A7E2V4              | 1837        | 172-208       | 197297.34                       | 6.35 | Homo sapiens       |
| ZSWIM9    | 374920    | C19        | 48170662   | 48197621  | Q86X18-2            | 920         | 869-901       | 101681.49                       | 8.51 | Homo sapiens       |
| ZSWIM1    | 71971     | C2         | 164822686  | 164826867 | Q9CWX7              | 455         | 333-375       | 51481.16                        | 6.49 | Mus musculus       |
| ZSWIM2    | 71861     | C2         | 83915079   | 83941226  | Q9D9X6              | 631         | 54-87         | 71792.83                        | 9.25 | Mus musculus       |
| ZSWIM3    | 67538     | C2         | 164805114  | 164822127 | Q8CFL8              | 695         | 530-571       | 79132.45                        | 6.42 | Mus musculus       |
| ZSWIM4    | 212168    | C8         | 84210942   | 84237042  | Q8C7B8              | 1101        | 134-171       | 122444.84                       | 6.89 | Mus musculus       |
| ZSWIM5    | 74464     | C4         | 116877402  | 116989105 | Q80TC6              | 1188        | 222-259       | 130926.95                       | 7.09 | Mus musculus       |
| ZSWIM6    | 67263     | C13        | 107724617  | 107890064 | Q80TB7              | 1207        | 238-275       | 132775.53                       | 7.03 | Mus musculus       |
| ZSWIM7    | 69747     | C11        | 62267224   | 62281395  | Q9CWX2              | 152         | 76-114        | 16658.21                        | 5.89 | Mus musculus       |
| ZSWIM8    | 268721    | C14        | 20706277   | 20723619  | Q3UHH1              | 1798        | 172-208       | 193566.37                       | 6.54 | Mus musculus       |
| ZSWIM9    | 321008    | C7         | 13258967   | 13278721  | Q6D192              | 849         | 798-830       | 95097.88                        | 8.9  | Mus musculus       |
| ZSWIM1    | 448297    | C10        | 19762900   | 19768378  | Q6DJ16              | 513         | 363-405       | 58364.57                        | 6.11 | Xenopus tropicalis |
| ZSWIM3    | 100485421 | C10        | 19754927   | 19758964  | F6WZM1              | 754         | 592-624       | 85895.36                        | 7.98 | Xenopus tropicalis |
| ZSWIM4    | 100497232 | C3         | 141215234  | 141229480 | L7N366              | 1092        | 123-160       | 121813.14                       | 7.88 | Xenopus tropicalis |
| ZSWIM5    | 100036685 | C4         | 90490121   | 90539947  | A1A5F7              | 1158        | 194-231       | 129150.78                       | 7.19 | Xenopus tropicalis |
| ZSWIM6    | 100490710 | C1         | 1189114940 | 189187303 | F6ZPJ5              | 1168        | 199-236       | 130398.21                       | 7.04 | Xenopus tropicalis |
| ZSWIM7    | 101735140 | C2         | 31208761   | 31255982  | AOA5G3HR40          | 137         | 76-114        | 15342.76                        | 5.52 | Xenopus tropicalis |
| ZSWIM8    | 100144740 | C7         | 44456662   | 44517241  | F6Z2T5              | 1830        | 162-198       | 200214.63                       | 6.2  | Xenopus tropicalis |
| ZSWIM9    | 100145494 | C7         | 103496998  | 103525861 | AOA810R3C6          | 554         | 508-540       | 63971.08                        | 8.06 | Xenopus tropicalis |
| ZSWIM2    | 561301    | C6         | 11760783   | 11764335  | A6H8U0              | 589         | 49-82         | 66843.41                        | 9.15 | Danio rerio        |
| ZSWIM5    | 100149522 | C2         | 27491101   | 27541205  | B8JLP8              | 1151        | 187-236       | 128457.69                       | 7.2  | Danio rerio        |
| ZSWIM6    | 403057    | C10        | 44275588   | 44337752  | Q4VBG8              | 1132        | 163-212       | 127022.4                        | 7.8  | Danio rerio        |
| ZSWIM7    | 325530    | C5         | 62726352   | 62771251  | A4FV10              | 140         | 76-114        | 15440.88                        | 6.87 | Danio rerio        |
| ZSWIM8    | 100148379 | C13        | 21824967   | 21885562  | B8A5T6              | 1912        | 162-198       | 205870.84                       | 6.35 | Danio rerio        |
